# Supplementary material for: Health Economic Evaluations of Genomic Newborn Screening: Approaches by studies within the International Consortium on Newborn Sequencing
Source: Research Square preprint supplement (doi:10.21203/rs.3.rs-8303779/v1), 2026-01-14
Supplement: Supplementary file 1 [file 4d69fc942504898959ee8640.docx]

| **Table 1.** Global newborn genomic sequencing studies included in this study | | | | | | | |
| --- | --- | --- | --- | --- | --- | --- | --- |
| **Project Name** | **Country** | **Study Design** | **Planned Enrollment** | **Sequencing Type** | **Project Status** | **Planned Health Economic Analysis** | **Primary research goal related to economic evaluation** |
| BabyDetect | Belgium | Prospective observational pilot study | 7,000 | Panel | Complete | Yes | Evaluate the costs of implementing a gNBS program and demonstrate its economic impact |
| BabyScreen+ | Australia | Prospective implementation pilot study | 1,000 | GS | Complete | Yes | Explore public preferences for the value and implementation of gNBS and evaluate its cost-effectiveness relative to current newborn bloodspot screening |
| BabySeq | United States | Randomized controlled trial | 500 | GS | Ongoing | Yes | Understand the health and cost impact of genomic sequencing as a screening tool for all infants |
| BeginNGS | United States | Prospective observational pilot study | 10,000 to 100,000 | GS/ES | Ongoing | Yes | Model-based economic evaluation of gNBS using study results and a literature-based comparator |
| Early Check | United States | Prospective observational pilot study | 10,000 | GS/ES | Ongoing | Unsure | N/A |
| FirstSteps | Greece | Prospective observational pilot study | 101,000 | GS/ES | Ongoing | Yes | Model-based health economic evaluation |
| Generation Study | England | Prospective observational pilot study | 100,000 | GS | Ongoing | Yes | Estimate the costs and benefits of gNBS alongside current  newborn bloodspot screening |
| gEnomics4newborns | Australia | Multi-modal research (interviews, equity-informed economic modelling, choice experiment, deliberative methods) to explore legal, ethical, equity, and economic implications of gNBS | N/A | N/A (no sequencing is being conducted as part of this study) | N/A | Yes | Investigate how ethics, equity effectiveness and economic aspects of using genomics in newborn screening should be assessed |
| GUARDIAN (ESLI proposal) | United States | Prospective observational pilot study | 100,000 | GS | Expected | Yes | Assess the total upfront costs associated with gNBS and traditional NBS using a microcosting approach;  Assess the economic value of gNBS compared with NBS using a model-based economic evaluation |
| NewbornslnSA | Australia | Prospective observational pilot study | 1,000 | GS | Ongoing | Yes | Compare preliminary estimates of cost-effectiveness across targeted and non-targeted GS screening approaches. |
| PERIGENOMED | France | Prospective observational pilot study | 20,000 | GS | Expected | Yes | Not specified |
| New Jersey Task Force | United States | Prospective observational pilot study | Not specified | Not specified | Not specified | Unsure | N/A |
| GS, Genome Sequencing; ES, Exome Sequencing; Panel, Targeted Gene Panel Sequencing; ELSI, ethical, legal, social implications  N/A, not applicable | | | | | | | |
