# Supplementary material for: Health Economic Evaluations of Genomic Newborn Screening: Approaches by studies within the International Consortium on Newborn Sequencing
Source: Research Square preprint supplement (doi:10.21203/rs.3.rs-8303779/v1), 2026-01-14
Supplement: Supplementary file 2 [file 72d01b0e05bfd533f9cbff3f.docx]

| **Table 3.** Data collection approach and instruments for health, healthcare, and cost outcomes in newborn genomic sequencing studies (n=12) | | | |
| --- | --- | --- | --- |
| **Outcome, n (%)** | **Data Collection Instrument/Approach** | **n** | **Studies** |
| Infant health-related quality of life,  6 (50) | EQ-TIPS | 2 | BabySeq; Generation Study |
| HUI 2/3 | 1 | BabyDetect |
| PedsQL | 3 | BabyDetect; PERIGENOMED; FirstStepsa |
| Parent health-related quality of life,  4 (33) | EQ-5D-3L | 1 | BabySeq |
| EQ-5D-5L | 1 | Generation Study |
| PedsQL-Family Impact Module | 2 | BabyDetect, Generation Study |
| SF-12 | 1 | PERIGENOMED |
| Actions recommended based on genomic sequencing results,  8 (67) | Bespoke items/case report forms | 5 | BabyDetect; BabySeq; Early Check; FirstSteps; NewsbornInSA |
| C-GUIDE | 2 | Generation Study, BabyScreen+ |
| Not specified | 1 | New Jersey Task Force |
| Follow-through on recommended actions,  4 (33) | Bespoke items/case report forms | 2 | BabySeq; FirstSteps |
| Not specified | 2 | Early Check; New Jersey Task Force |
| Infant health care utilization,  8 (67) | Bespoke items/case report forms | 4 | BabyDetect; BabySeq; FirstSteps, NewbornsInSA |
| Not specified | 4 | PERIGENOMED; Early Check; GUARDAIN (ESLI proposal); BabyScreen+ |
| Health care costs,  6 (50) | Bespoke items | 2 | BabyDetect; BabySeq; NewsbornInSA |
| National reference cost database | 1 | Generation Study |
| Not specified | 2 | BabyScreen+; PERIGENOMED |
| Personal costs for parents and infants (e.g., out-of-pocket health care costs),  4 (33) | Bespoke items (e.g., out-of-pocket expenses for healthcare visits, services, equipment and therapies, employment and productivity costs, childcare and schooling costs, and family) | 4 | BabySeq; BabyDetect; Generation Study; NewbornsInSA |
| a modified version of instrument used  C-GUIDE, Clinician-reported Genetic testing Utility InDEx; EQ-TIPS, EuroQol Toddler and Infant Populations; HUI, Health Utilities Index; PedsQL Family Impact Module, Pediatric Quality of Life Inventory Family Impact Module; EQ-5D, EQ 5-Dimension Questionnaire; EQ-3D, EQ 3-Dimension Questionnaire; SF-12, 12-Item Short Form Health Survey | | | |
