# Supplementary material for: Health Economic Evaluations of Genomic Newborn Screening: Approaches by studies within the International Consortium on Newborn Sequencing
Source: Research Square preprint supplement (doi:10.21203/rs.3.rs-8303779/v1), 2026-01-14
Supplement: Supplementary file 3 [file 9fadb00329c617c0dfeafea5.docx]

| **Table 2.** Health, healthcare, and cost outcomes collected in newborn genomic sequencing studies (n=12) | | | | | |
| --- | --- | --- | --- | --- | --- |
| **Outcome** | **n (%); Study names and data collection time points by data source** | | | | |
| **Administrative Records** | **Electronic Health Records** | **Parent Surveys** | **Clinician Surveys** | **Other** |
| **Infant health-related quality of life** | 1 (8)  New Jersey Task Forced | 1 (8)  New Jersey Task Forced | 5 (42)  BabySeqa,c,d; BabyDetecte;  FirstStepsd,e;  Generation Studya,d;  PERIGENOMEDd,e; | 1 (8)  FristStepsd,e | 1 (8)  *Generation Study:* Data for a control population of newborns not undergoing sequencing will be sourced from the literature and combined with prospectively collected data for newborns undergoing sequencing. |
| **Parent health-related quality of life** | 0 (0) | 0 (0) | 5 (42)  BabySeqa,c,d; BabyDetecte; PERIGENOMEDd; Generation Studya,d;  NewbornsInSAa,d | 0 (0) | 1 (8)  *Generation Study:* Data for a control population of parents whose newborn is not undergoing sequencing will be sourced from the literature and combined with prospectively collected data for newborns undergoing sequencing. |
| **Actions recommended based on genomic sequencing results** | 4 (33)  BabyDetecte;  Early Checkd,e;  FristStepsd,e;  New Jersey Task Forced | 4 (33)  BabyScreen+d,e;  FristStepsd,e;  GUARDIAN (ESLI proposal)d;  NewbornsInSAd | 3 (25)  BabySeqd;  Early Checkd,e  NewbornsInSAd; | 4 (33)  BabyDetecte;  FirstStepsd,e;  Generation Studyd; NewbornsInSAd | 3 (25)  *BabySeq*: Chart notes from study-affiliated genetic counselor disclosure sessions sent to newborn's healthcare provider.  *BeginNGS:* Expert panel uses Delphi method to assess treatment initiation likelihood and benefits for disorders with similar treatments and outcomes.  *Generation Study:* Bespoke clinician survey questions post-testing. |
| **Follow-through on recommended actions** | 3 (25)  FristStepsd,e;  Early Checkd;  New Jersey Task Forced | 4 (33)  BabyScreen+d;  BabySeqd;  FirstStepsd,e;  New Jersey Task Forced | 1 (8)  BabySeqd | 1 (8)  FirstStepsd,e | 0 (0) |
| **Infant health care utilization** | 2 (17)  BabyDetecte; FirstSepsd,e | 6 (50)  BabyScreen+;  BabySeqa,c,d;  FirstStepsd,e;  Generation Studyc,d;  PERIGENOMEDd,e;  NewbornsInSAd | 2 (17)  BabySeqd;  GUARDIAN (ESLI proposal)f | 2 (17)  BabySeqa,c,d;  GUARDIAN (ESLI proposal)f | 2 (17)  *Generation Study:* Secondary care resource use by the newborn (hospital episode statistics) will be linked to their clinical/genetic records.  *GUARDAIN (ESLI proposal):* Cross sectional survey data and interviews to retrospectively estimate what resources are used from the time from blood spot collection to the return of genomic NBS results. |
| **Health care costs** | 3 (25)  BabyDetecte; NewbornsInSAd;  PERIGENOMEDd,e | 3 (25)  BabyScreen+d,e;  BabySeqa,c,d; PERIGENOMEDd,e | 2 (17)  BabySeqa,c,d; NewbornsInSAd | 0 (0) | 2 (17)  *Generation Study:* National Reference Cost database.  *BabyScreen+:* data on infants diagnosed with the same conditions using standard approaches will be sourced from the literature and local databases |
| **Personal costs for parents and infants (e.g., out-of-pocket health care costs)** | 0 (0) | 1 (8)  BabySeqa,c,d | 3 (25)  BabySeqa,c,d;  BabyDetecte;  Generation Studyd;  NewbornsInSAd,e | 0 (0) | 0 (0) |
| a At the time of consent for the study; b Prior to birth; c After birth, but before return of sequencing results; d After the return of sequencing results; e Long-term follow-up; f Other | | | | | |
