# Supplementary material for: Health Economic Evaluations of Genomic Newborn Screening: Approaches by studies within the International Consortium on Newborn Sequencing
Source: Research Square preprint supplement (doi:10.21203/rs.3.rs-8303779/v1), 2026-01-14
Supplement: Supplementary file 4 [file ea46eda8f491ca92842c32e9.docx]

| **Table 4.** Psychosocial measures administered in genomic newborn sequencing studies (n=12) | | | |
| --- | --- | --- | --- |
| **Psychosocial Outcome** | **n (%)** | **Project(s)** | **Instrument(s) used to assess outcomes** |
| **Collecting psychosocial outcomes as primary data** | | | |
| Yes | 8 (58) | BabyScreen+, BabySeq, BabyDetect, Early Check, FirstSteps, Generation Study, PERIGENOMED, NewbornsinSA | |
| No | 2 (17) | BeginNGS, New Jersey Task Force | |
| **Types of psychosocial outcomes** | | | |
| Parental anxiety | 7 (58) | BabyScreen+, BabySeqa,c,d, Early Checkd, FirstStepsd,e , Generation Studya,d, PERIGENOMEDd,e, NewbornsInSAa,d | Customized version of Moore’s Outcomes-mapped questionnaire, GAD-7, HADS, STAI-6, PHQ-2, GAD-2, PHQ-9 |
| Parental depression | 5 (42) | BabyScreen+, BabySeqa,c,d, Early Checkd, PERIGENOMEDe, NewbornsInSA a,d | PHQ-8, HADS, CES-D, PHQ-2, GAD-2, PHQ-9, EPDS-9 |
| Parental stress | 4 (33) | BabySeqa,c,d, BabyDetecte, FirstStepsd,e, PERIGENOMEDd,e | Customized version of Moore’s Outcomes-mapped questionnaire, PSI/-4SF, PSS |
| Parental feelings about test results | 5 (42) | BabySeq a,c,d, Early Checke, FirstStepsd,e, PERIGENOMEDd,e, NewbornsInSA a,d | Customized version of Moore’s Outcomes-mapped questionnaire, FACToR, PUGS, customized application of HBM |
| Perceived vulnerability of the child | 3 (25) | BabySeqd, FirstStepsd,e, Generation Studyd | Customized version of Moore’s Outcomes-mapped questionnaire, VBS |
| Personal or perceived utility of genomic sequencing | 6 (50) | BabySeqa,c,d, Early Checke, FirstStepsd,e, Generation Studyd, PERIGENOMEDd, NewbornsInSAa,d | GENE-U, Parent PrU, customized application of HBM |
| Parental relationship satisfaction | 2 (17) | BabySeqa,c,d,FirstStepsd | KMS |
| Parental blame and/or guilt | 2 (17) | BabySeqa,c,d, PERIGENOMED d,e | Bespoke items |
| Other | 3 (25) | BabyScreen+, Generation Studyd, NewbornsInSAa,d | PedsQL Family Impact Module, MIBS, Decisional conflict scale, Decisional regret scale, willingness-to-pay, customized application of HBM |
| a At the time of consent for the study; b Prior to birth; c After birth, but before return of sequencing results; d After the return of sequencing results; e Long-term follow-up; f Other  CESD: Center for Epidemiologic Studies Depression Scale, EPDS-9: Edinburgh Postnatal Depression Scale 9, FACToR: Feelings About Genomic Testing Results, GAD-2: Generalized Anxiety Disorder 2, GAD-7: Generalized Anxiety Disorder 7, GENE-U: GENEtic Utility Scale, HADS: Hospital Anxiety and Depression Scale, HBM: Health Belief Model, KMS: Kansas Marital Satisfaction Scale, MIBS: Mother-to-Infant Bonding Scale, PedsQL: Pediatric Quality of Life Inventory Family Impact Module, PHQ-2: Patient Health Questionnaire 2, PHQ-9: Patient Health Questionnaire 9, Parent PrU: Parent Personal Utility Scale, PSI: Parenting Stress Index, PSS: Parental Stress Scale (PSS), PUGS: Perceptions of Uncertainties in Genome Sequencing, STAI-6: State-Trait Anxiety Inventory – 6 item, VBS: Vulnerable Baby Scale | | | |
